# Supplementary material for: Del-Nido cardioplegia in cardiac surgery for elderly patients: a propensity score-matched analysis
Source: PubMed Central journal article supplement (PMC10131453; doi:10.1186/s13019-023-02269-3), 2023-04-25
Supplement: 13019_2023_2269_MOESM1_ESM.pdf [file 13019_2023_2269_MOESM1_ESM.pdf]

**Supplement Table.** Formula of cardioplegia

|                                | DNC                                                                      | CBC                      |                      |
|--------------------------------|--------------------------------------------------------------------------|--------------------------|----------------------|
|                                |                                                                          | Initial dosage           | Sequential dosage    |
| Volume                         | Initial: 20ml/kg, up to<br>1000ml<br>Sequential: 10ml/kg, up to<br>500ml | 20ml/kg, up to<br>1000ml | 10ml/kg, up to 500ml |
| Composition (per set)          |                                                                          |                          |                      |
| Base solution                  | Plasma-Lyte A 500ml                                                      | NS 500ml                 | NS 500ml             |
| 25% MgSO <sub>4</sub>          | 4ml                                                                      | 19.2ml                   | 19.2ml               |
| 10% KCl                        | 10ml                                                                     | 35ml                     | 14ml                 |
| 2% Lidocaine                   | 3.25 ml                                                                  | 10ml                     | 2.5ml                |
| 20% mannitol                   | 8.15ml                                                                   |                          |                      |
| 5 % NaHCO <sub>3</sub>         | 11ml                                                                     |                          |                      |
| Final concentration of<br>ions |                                                                          |                          |                      |
| K <sup>+</sup>                 | 24 mEq/L                                                                 | 20 mEq/L                 | 10 mEq/L             |
| Mg <sup>2+</sup>               | 12 mEq/L                                                                 | 14 mEq/L                 | 14 mEq/L             |
